# Supplementary material for: Transcriptomic Signatures of Experimental Alkaloid Consumption in a Poison Frog
Source: MDPI journal article supplement (doi:10.3390/genes10100733), 2019-09-21
Supplement: s1 [file s1]

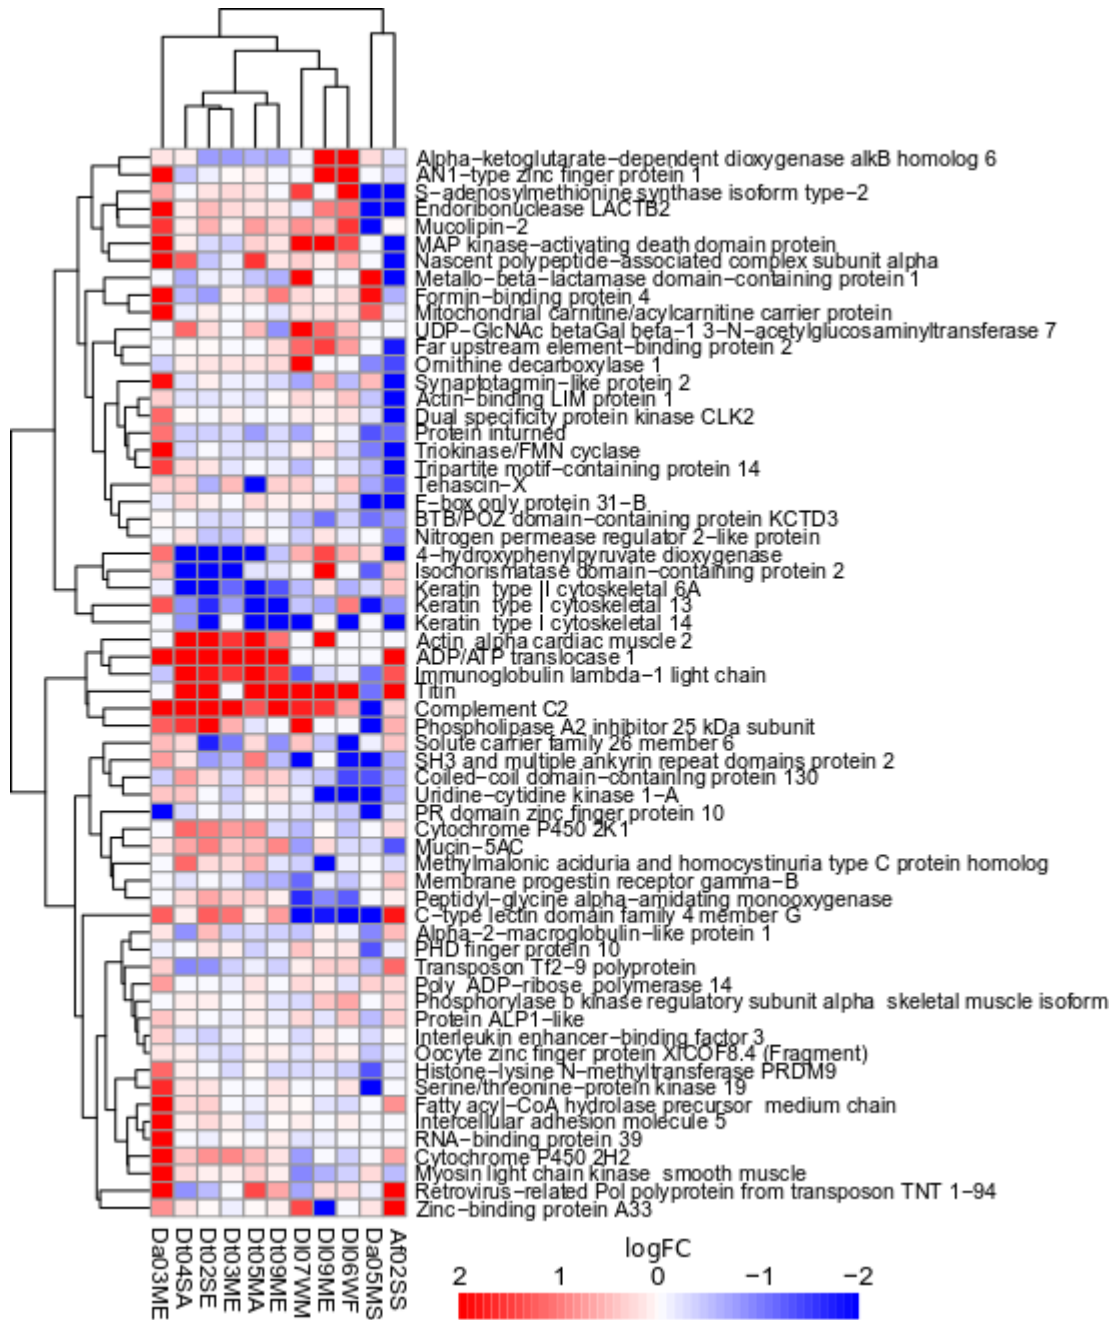

**Figure SM6.1. LogFC of genes identified as differentially expressed for the comparisons single-dose vs control and multi-dose vs control in *D. tinctorius*.** In the sample names, the first two characters indicate the species, the second two the individual, and the last two the treatment. Species: Dt = *D. tinctorius*, Da = *D. auratus*, Dl = *D. leucomelas*, Af = *A. femoralis*. Treatments: SE = single-dose epibatidine, SA = single dose alkaloid mixtures, ME = multi-dose epibatidine, MA = multi-dose alkaloid mixture, MS = multi-dose sparteine, WM/WF = wild. For visualization, this heatmap has a ceiling of  $\log\text{FC} \pm 2$ . LogFC values are given in SM5.

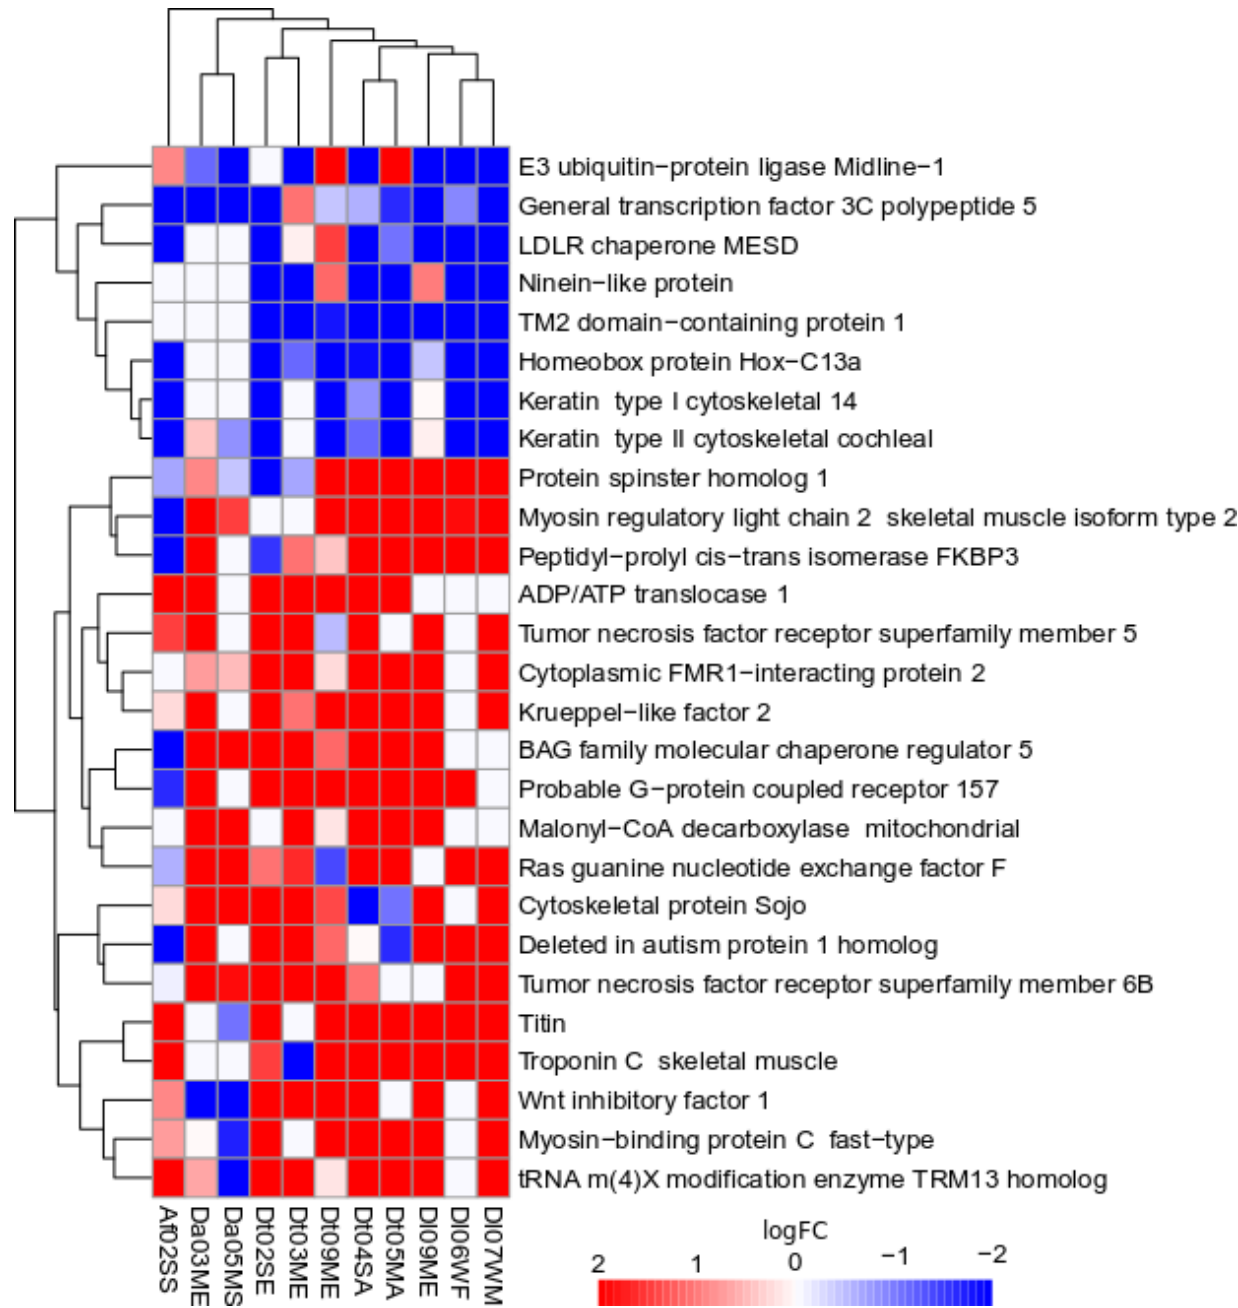

**Figure SM6.2. LogFC of genes identified having a similar expression pattern across species by filtering genes with an absolute logFC > 2 for 5/11 treatment-control pairs.** In the sample names, the first two characters indicate the species, the second two the individual, and the last two the treatment. Species: Dt = *D. tinctorius*, Da = *D. auratus*, Dl = *D. leucomelas*, Af = *A. femoralis*. Treatments: SE = single-dose epibatidine, SA = single dose alkaloid mixtures, ME = multi-dose epibatidine, MA = multi-dose alkaloid mixture, MS = multi-dose sparteine, WM/WF = wild. For visualization, this heatmap has a ceiling of logFC  $\pm$  2. LogFC values are given in SM5.
