# Supplementary material for: Transcriptomic Signatures of Experimental Alkaloid Consumption in a Poison Frog
Source: MDPI journal article supplement (doi:10.3390/genes10100733), 2019-09-21
Supplement: s1 [file s1]

SDN002 \* DAT/DAT  
M axE3 SumE6  
RI3 33620 18895

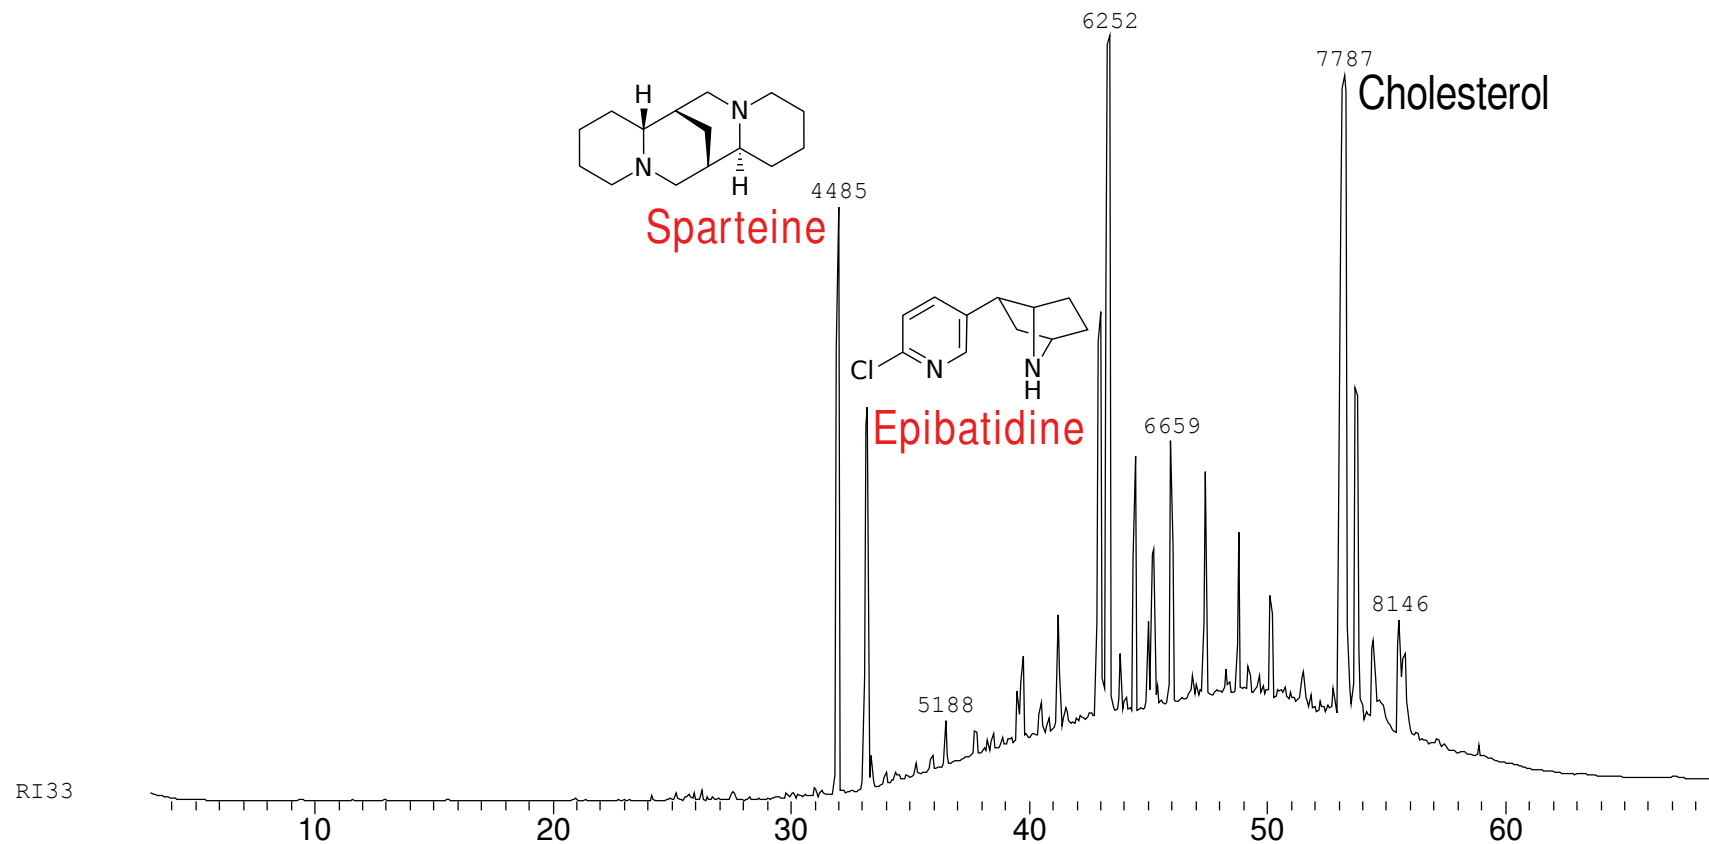

Figure SM7. GC/MS chromatogram of the skin extract of *Dendrobates auratus* fed with epibatidine and sparteine.
