# Supplementary material for: Transcriptomic Signatures of Experimental Alkaloid Consumption in a Poison Frog
Source: MDPI journal article supplement (doi:10.3390/genes10100733), 2019-09-21
Supplement: s1 [file s1]

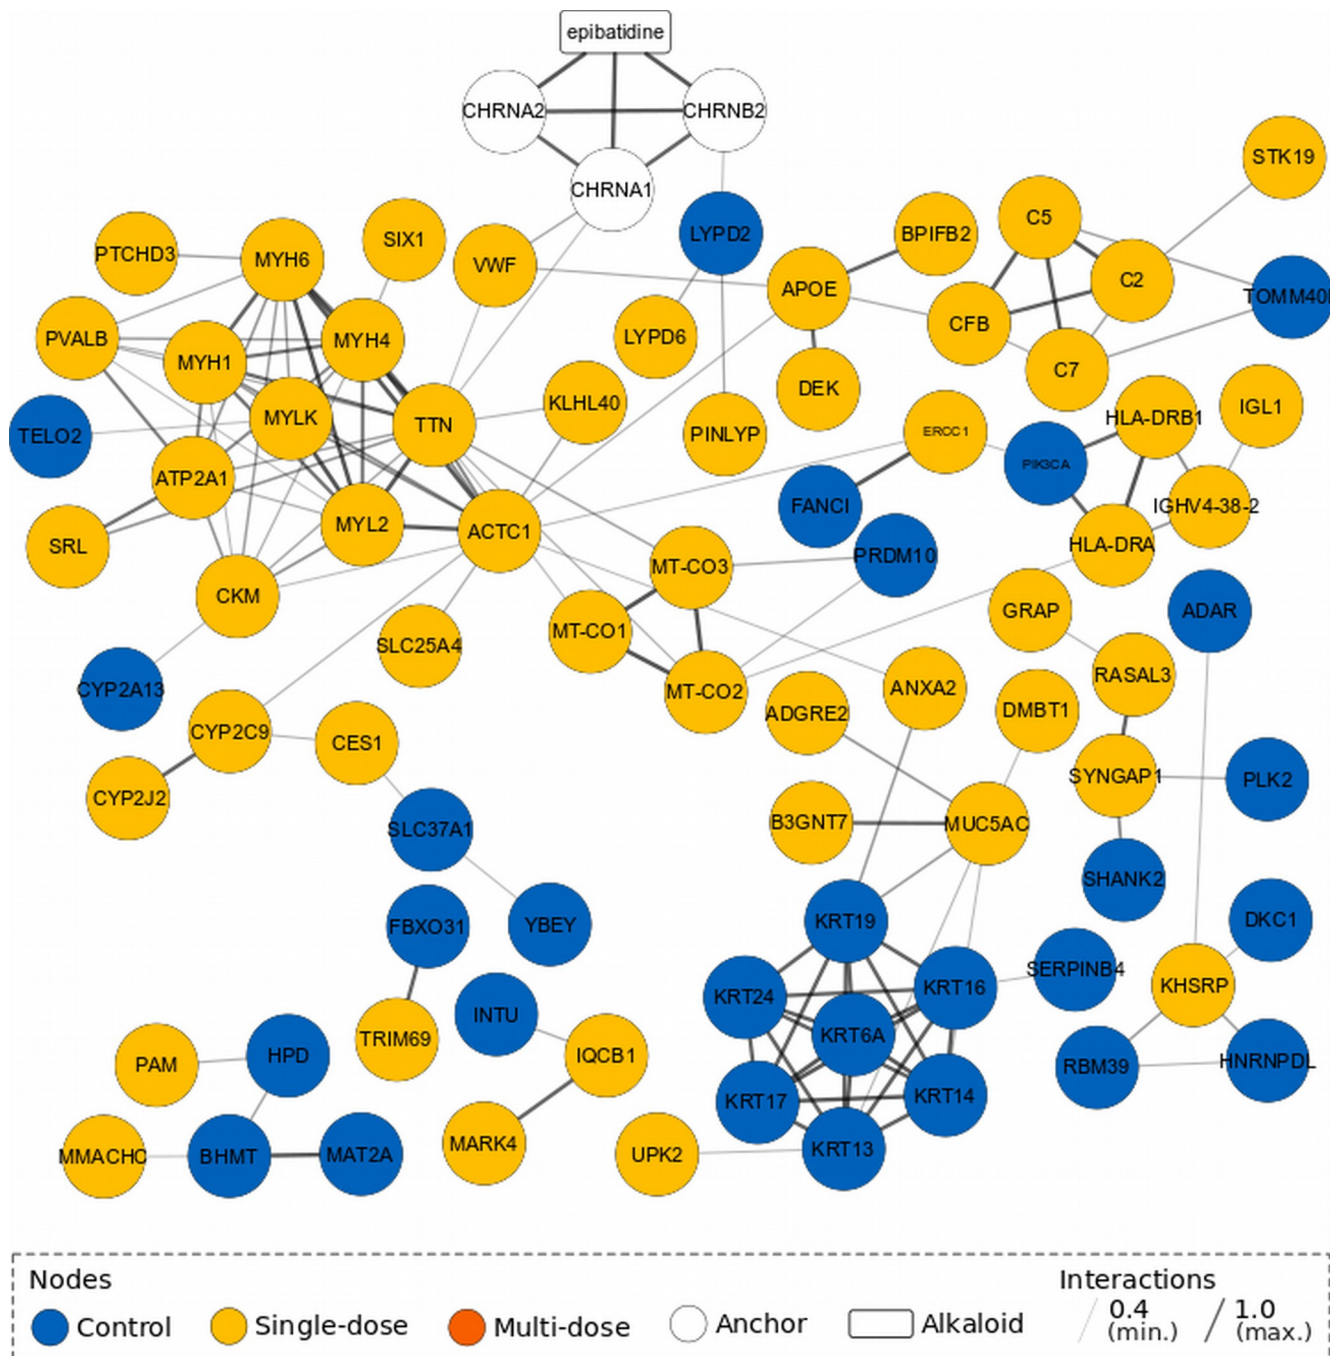

**Figure SM4.1. Protein-protein interaction networks of proteins predicted from the differentially expressed genes in *D. tinctorius* for the comparison single-dose vs control.** For visualization, we further connected the generated networks to epibatidine because this was the alkaloid used in both single-dose and multi-dose treatments. A network of epibatidine and nicotinic acetylcholine receptors (epibatidine's main target) was obtained from the STITCH database in the StringApp.

Multi-dose vs Control

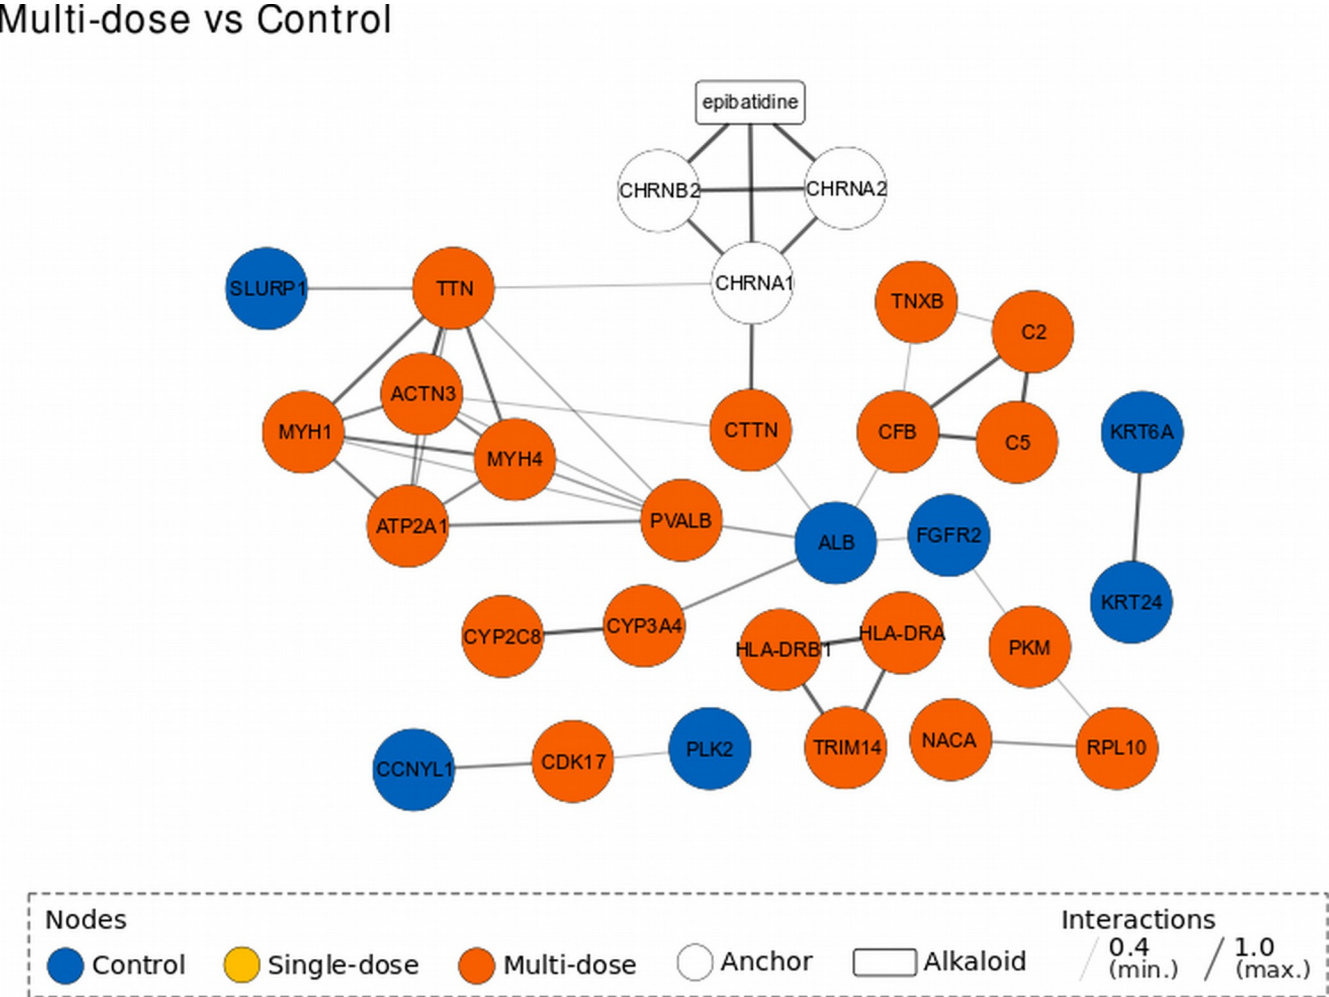

**Figure SM4.2. Protein-protein interaction networks of proteins predicted from the differentially expressed genes in *D. tinctorius* for the comparison multi-dose vs control.** For visualization, we further connected the generated networks to epibatidine because this was the alkaloid used in both single-dose and multi-dose treatments. A network of epibatidine and nicotinic acetylcholine receptors (epibatidine's main target) was obtained from the STITCH database in the StringApp.

Multi-dose vs Single-dose

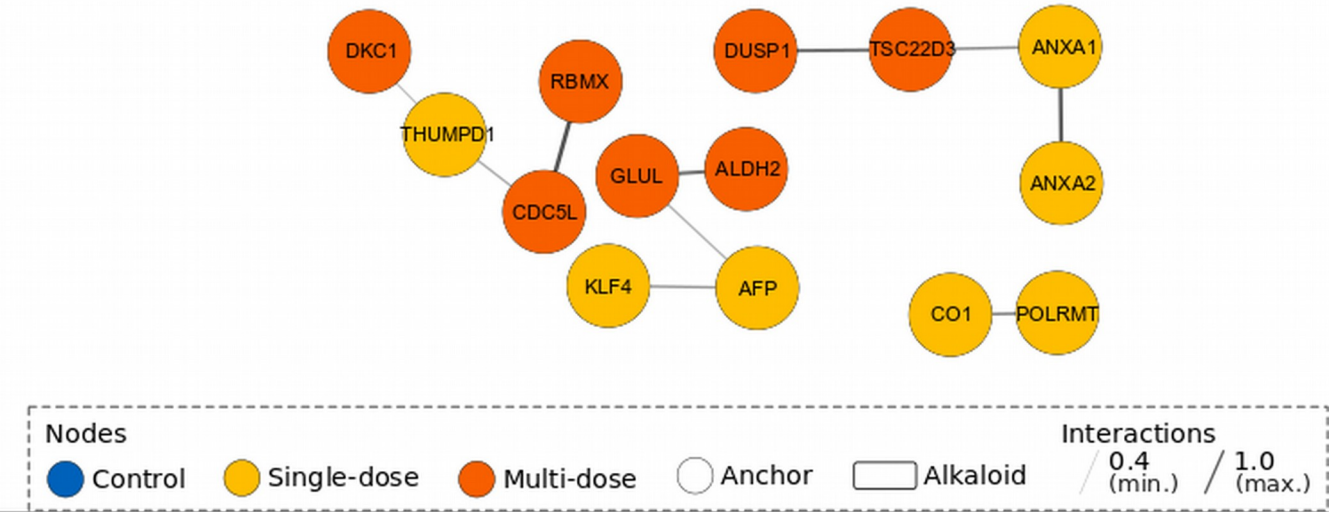

**Figure SM4.3. Protein-protein interaction networks of proteins predicted from the differentially expressed genes in *D. tinctorius* for the comparison single-dose vs multi-dose.**

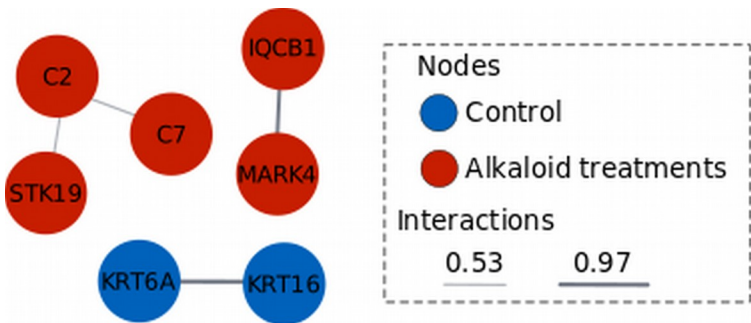

**Figure SM4.3. Protein-protein interaction network of proteins predicted from the differentially expressed genes in *D. tinctorius* for the comparison alkaloid vs control.**
