# Supplementary material for: Transcriptomic Signatures of Experimental Alkaloid Consumption in a Poison Frog
Source: MDPI journal article supplement (doi:10.3390/genes10100733), 2019-09-21
Supplement: s1 [file s1]

# **Dry-lab pipeline**

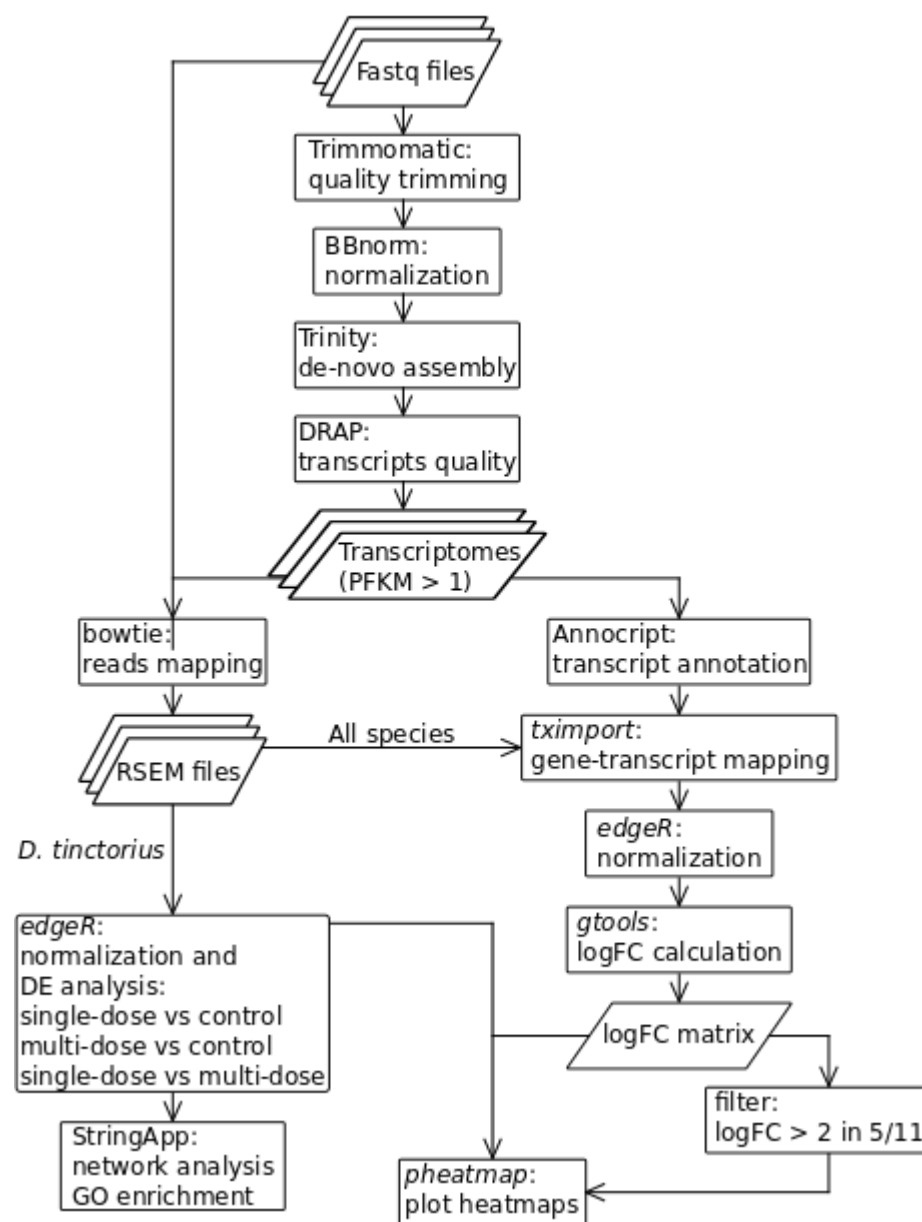

**Figure SM1. Bioinformatic pipeline used for the analysis of gene expression data.**
